# Supplementary material for: Toripalimab plus chemotherapy and radiotherapy for treatment-naive advanced esophageal squamous cell carcinoma: a single-arm phase 2 trial
Source: PubMed Central journal article supplement — Nat Commun. 2024 Aug 20;15:7116. doi: 10.1038/s41467-024-51105-2 (PMC11335900; doi:10.1038/s41467-024-51105-2), 2024-08-20
Supplement: 41467_2024_51105_MOESM3_ESM.pdf [file 41467_2024_51105_MOESM3_ESM.pdf]

## **Description of Additional Supplementary Files**

**Supplementary Data 1** – List of antibody clones utilized for Flow Cytometry.
